1 **Karrikin-sensing protein KAI2 is a new player in regulating root growth patterns**

2

3

4 Stéphanie M. Swarbreck<sup>1\*</sup>, Yannick Guerringue<sup>1,2</sup>, Elsa Matthus<sup>1</sup>, Fiona J. C. Jamieson<sup>1,3</sup> and

5 Julia M. Davies<sup>1</sup>

6

7 <sup>1</sup> Department of Plant Sciences, University of Cambridge, Cambridge, CB2 3EA, United

8 Kingdom

9 <sup>2</sup> ENS de Lyon - Site Monod, Lyon, 69007, France

10 <sup>3</sup> Department of Plant Sciences, University of Oxford, South Parks Road, Oxford, OX1 3RB,

11 United Kingdom

12 \* Corresponding author, [ss2062@cam.ac.uk](mailto:ss2062@cam.ac.uk), 01223-748-980

13

14 Total word count: 6,192

15 Word count Introduction: 708

16 Word count Materials and Methods: 1,419

17 Word count Results: 2,557

18 Word count Discussion: 1,236

19 Total number of figures: 8

20 Total number of supplementary figures: 6

21

22

## 23 **Summary**

24 Roots form highly complex systems varying in growth direction and branching pattern to  
25 forage for nutrients efficiently. Here mutations in the KAI2 (KARRIKIN INSENSITIVE)  $\alpha/\beta$ -  
26 fold hydrolase and the MAX2 (MORE AXILLARY GROWTH 2) F-box leucine-rich protein,  
27 which together perceive karrikins (smoke-derived butenolides), caused alteration in root  
28 growth direction (root skewing and waving) of *Arabidopsis thaliana*. This exaggerated root  
29 skewing was independent of endogenous strigolactone perception by the D14  $\alpha/\beta$ -fold  
30 hydrolase and MAX2. Thus KAI2/MAX2's regulation of root growth may be through  
31 perception of endogenous KAI2-ligands, which have yet to be identified. Degradation targets  
32 of the KAI2/MAX2 complex, SMAX1 (SUPPRESSOR OF MAX2-1) and SMXL6,7,8  
33 (SUPPRESSOR OF MAX2-1-LIKE) are also involved in the regulation of root skewing.  
34 Genetic data reveal a new potential target for degradation, as mutation in the SKS3 (SKU5  
35 similar) but not the SKU5/SKS17 root plasma membrane glycoprotein suppresses the  
36 exaggerated root skewing induced by the lack of MAX2. In *Arabidopsis thaliana* therefore, the  
37 KAI2 karrikin-sensing protein acts to limit root skewing, and we propose a mechanism  
38 involving root radial expansion as the mutant's gravitropic and mechano-sensing responses  
39 remained largely unaffected.

40

41

## 42 **Introduction**

43 Roots grow in complex patterns that are highly relevant to their adaptation to different soil  
44 conditions and yet very difficult to investigate in this complex medium. *Arabidopsis thaliana*  
45 roots grown vertically on solid medium produce specific surface-dependent growth patterns  
46 described as skewing (deviation from vertical) and waving (Roy & Bassham, 2014).  
47 Established differences amongst *Arabidopsis* ecotypes suggest that these patterns may reflect  
48 an adaptive response relevant to natural soil conditions (Vaughn & Masson, 2011; Schultz *et*  
49 *al.*, 2017).

50 While root skewing has been widely observed and reported, it is not fully understood  
51 and no model akin to that available for the root gravitropic response has been proposed (Darwin  
52 & Darwin, 1880; Oliva & Dunand, 2007; Roy & Bassham, 2014). The characterization of  
53 *Arabidopsis* mutants has been critical in identifying genetic components that can govern root  
54 skewing and waving (Okada & Shimura, 1990; Wang *et al.*, 2011; Shih *et al.*, 2014), which  
55 represent the integrated response to gravity, light and contact with the solid medium as the root

56 tip grows on the surface of the agar (Thompson & Holbrook, 2004). A skewing phenotype in  
57 mutants impaired in mechano-sensing such as *feronia* (Shih *et al.*, 2014) or *cml24* (Wang *et*  
58 *al.*, 2011) supports a link between root skewing and thigmomorphogenesis (morphological  
59 change in response to mechanical stimulation from surface contact).

60 The role of plant hormones in root skewing and waving is poorly understood but auxins  
61 (Okada & Shimura, 1990), ethylene (Buer *et al.*, 2000; 2003), cytokinins (Kushwah *et al.*,  
62 2011) and brassinosteroids (Lanza *et al.*, 2012) are implicated. Little is known of the role of a  
63 recently characterized set of phytohormones, strigolactones (SL, Roy & Bassham, 2014) and  
64 related smoked-derived butenolides, karrikins (KAR, Flematti *et al.*, 2015) or the as yet  
65 unidentified endogenous ligands of the KAI2 (KARRIKIN INSENSITIVE) karrikins receptor  
66 (KAI2 ligand, KL, Sun *et al.*, 2016).

67 Many elements of the KAR/KL perception pathway have been elucidated and are either  
68 shared or related to components of the SL perception pathway. The current model suggests that  
69 KARs and KLs are perceived by binding the  $\alpha/\beta$ -fold hydrolase KAI2/D14-like protein  
70 (Waters *et al.*, 2012; Bythell-Douglas *et al.*, 2013), while SLs bind a related  $\alpha/\beta$ -fold hydrolase  
71 called D14 (Hamiaux *et al.*, 2012; Chevalier *et al.*, 2014; Yao *et al.*, 2016). D14 can form a  
72 complex with MAX2 (MORE AXILLARY GROWTH2), a leucine-rich repeat F-box protein  
73 (Zhao *et al.*, 2015; Yao *et al.*, 2016). It has been hypothesised that KAI2 can also form such a  
74 complex with MAX2 though no physical interaction has been confirmed yet (Conn & Nelson,  
75 2016). In addition, the KAR-dependent degradation of KAI2 can occur independently from  
76 MAX2, independently of ubiquitination or the activity of the 26S proteasome (Waters *et al.*,  
77 2015a). More recently heat-shock related proteins have been identified as degradation targets  
78 of MAX2 in rice (D53, Jiang *et al.*, 2013; Zhou *et al.*, 2013) and *Arabidopsis* (SMXL,  
79 SUPPRESSOR OF MAX2-1-LIKE, (Stanga *et al.*, 2013; Soundappan *et al.*, 2015). Thus far,  
80 a dichotomy has been proposed with SMAX1 (SUPPRESSOR OF MAX2-1) suppressing  
81 karrikin-related *max2* phenotypes (*e.g.*, germination and hypocotyl elongation) while other  
82 members of the SMXL family, namely SMXL6, SMXL7 and SMXL8, suppress SL-related  
83 phenotypes (*e.g.*, shoot branching and lateral root density, Waters *et al.*, 2017). While some  
84 specificity of SL or KAR/KL signalling is established through the receptors, additional  
85 specificity is reinforced through the degradation targets. And, these have been described not  
86 merely as suppressors of signalling but also as growth regulators, the activities of which are  
87 modulated through SL or KAR/KL signalling (Jiang *et al.*, 2013).

88 Here a role for KAI2-dependent and MAX2-dependent signalling in regulating specific  
89 root growth patterns (skewing, and waving) is demonstrated for the first time, which challenges  
90 the current model of SL/KL specificity with regards to their interacting partners from the  
91 SMXLs family. KAR<sub>2</sub> or GR24<sub>rac</sub> (a synthetic analogue for SL and KAR) are shown to be poor  
92 analogues for KLs with regards to root skewing regulation. We propose that KAI2 and MAX2  
93 regulate these growth patterns through a mechanism involving root radial expansion as the  
94 mutants' gravitropic and mechano-sensing responses remained largely unaffected. In addition,  
95 this work establishes new connections between MAX2 and SKS3 (*SKU5* Similar), as we show  
96 genetic data placing both protein in the same genetic pathway regulating root skewing.

97

## 98 **Materials and Methods**

### 99 *Plant material and growth conditions*

100 Wild type *Arabidopsis* seeds Columbia-0 (Col) and Landsberg *erecta* (*Ler*) were the parental  
101 backgrounds for the mutants tested. Seeds for *max2* (*max2-1*) and *Atd14* (*Atd14-1*, (Waters *et*  
102 *al.*, 2012) were provided by Prof. Dame Ottoline Leyser (SLCU, Stimberg *et al.*, 2002). Seeds  
103 for *max2-7*, *max2-8*, *kai2-1*, *kai2-2*, *dlk2-1*, *dlk2-2*, *dlk2-3*, and KAI2:KAI2 (*kai2-2*) were a  
104 gift from Dr. Mark Waters (University of Western Australia, Waters *et al.*, 2012; 2015b). Seeds  
105 were surface sterilized by treatment with 70% (v/v) ethanol, followed by a rinse with sterile  
106 distilled water then incubation in 10% (v/v) sodium hypochlorite, 0.05% (v/v) Triton X-100  
107 for 5 minutes at 20°C with shaking (1,250 rpm). After a further five washes with sterile distilled  
108 water, seeds were placed on the surface of 0.8% (w/v) agar (BD, UK) supplemented with ½  
109 MS (Murashige and Skoog including vitamins, pH 5.6, Duchefa, The Netherlands).  
110 *Arabidopsis* seeds were stratified in the dark for 2 days at 4°C, before transfer to a growth  
111 cabinet under controlled conditions at 23°C, 16h light: 8h dark, and 80 μmol m<sup>-2</sup> s<sup>-1</sup> irradiance.  
112 Growth plates were vertical unless stated otherwise.

113

### 114 *Root skewing assay*

115 After 9 days, images were taken by scanning plates from the back (*i.e.*, roots were imaged  
116 through the agar) using a flat-bed scanner (300 dpi) and root skewing angles were measured in  
117 ImageJ (Schneider *et al.*, 2012) using the angle tool. NeuronJ (Meijering *et al.*, 2004) was used  
118 to record the *x* and *y* coordinates of the root tips and a marked section of the root. These  
119 coordinates were then used to calculate the horizontal growth index (HGI) and vertical growth  
120 index (VGI) as previously described (Grabov *et al.*, 2004; Vaughn & Masson, 2011). Waviness

121 was measured as the ratio of the cord to the root length (Grabov *et al.*, 2004; Vaughn & Masson,  
122 2011).

123

#### 124 *GR24<sub>rac</sub> and KAR<sub>2</sub>*

125 Plants were grown for 6 days on the surface of control medium (0.8% (w/v) agar supplemented  
126 with ½ MS, including vitamins, pH 5.6), then transferred to medium containing racemic  
127 GR24<sub>rac</sub> (LeadGen Labs, USA) or KAR<sub>2</sub> (Toronto Research Chemicals, Canada) or only the  
128 carrier for the test compound as a control (sterile distilled water for KAR<sub>2</sub> and 0.02% (v/v)  
129 acetone for GR24<sub>rac</sub>). Plants were then grown for a further three days before scanning.

130

#### 131 *Cell file rotation and root diameter analysis*

132 Images of the root tips from plants grown vertically for 6 days, then placed at a 45° angle from  
133 the vertical for a further 3 days, were taken using a Leica DFC365FX camera attached to a  
134 Leica M205FA Stereo microscope (Leica Microsystems Ltd, UK) with a Planapo x1.6  
135 objective set to magnification of x80.5. Images were stitched using the LAS X software  
136 platform (Leica Microsystems Ltd, UK). Following Wang *et al.* (Wang *et al.*, 2011) cell file  
137 rotation (CFR) was defined as the number of epidermal cell files that crossed a 1 mm long  
138 straight line drawn down the longitudinal axis of the root from 1.5 to 2.5 mm from the root  
139 apex. Using the same images as for CFR measurements, root diameter was measured  
140 approximately 2 mm from the root apex using ImageJ (Schneider *et al.*, 2012), three  
141 measurements were done per individual root.

142

#### 143 *Mechanical stimulation assays for transcriptional response*

144 Plants were grown vertically on the surface of control plates for 9 days were transferred to a  
145 sterile buffer solution (0.1 mM KCl, 10 mM CaCl<sub>2</sub> and 2 mM bis-Tris propane, pH 5.8 adjusted  
146 with 0.5 M MES). A total of 30 to 40 seedlings per genotype were transferred into a Petri dish  
147 (3 cm in diameter), containing 3 mL of buffer solution, and left to acclimatize on the bench for  
148 3 hours with additional light (15W/865 Lumilux Daylight, maximum intensity: 86 μmol m<sup>-2</sup> s<sup>-1</sup>  
149 <sup>1</sup>). Mechanical stimulation was applied by shaking vigorously for 30 seconds, while control  
150 plants remained on the bench. Plants were then left untouched for a further 30 minutes after  
151 stimulation before being immersed in RNALater (Sigma Aldrich) for sample collection as  
152 described previously. For both assays, RNA was extracted from roots using the RNeasy Plant  
153 Mini kit (Qiagen) per manufacturer's instructions, including an additional DNase digestion

154 step. A LiCl precipitation step was used to purify and concentrate the RNA before downstream  
155 qPCR analysis.

156

### 157 *cDNA synthesis and transcript abundance measurement*

158 Complementary DNA (cDNA) was synthesized from 500 ng RNA using the RT QuantiTect  
159 reverse transcription kit (Qiagen), following manufacturer's instructions except that incubation  
160 time was lengthened for the gDNA Wipeout step (3 minutes at 42°C) and the cDNA synthesis  
161 (25 minutes at 42°C). cDNA was used as template in a quantitative real-time PCR using the  
162 SYBR GREEN PCR kit (Qiagen) and the Rotor-Gene 3000 thermocycler (Qiagen) to  
163 determine transcript abundance of the genes of interest *Calmodulin-like (CML) 12* and *CML24*.  
164 qPCR amplification cycle consisted of 5 min at 95°C followed by 40 cycles of 5 s at 95°C and  
165 10 s at 60°C. Melting curves (ramping from 55°C to 95°C rising 1°C each step, with a 5s delay  
166 between steps) were checked for unspecific amplification. qPCR traces were analysed using  
167 the R qpcR package (relevant parameters: data were normalized and the background  
168 subtracted; starting fit model: l4; efficiency estimation: cpD2; refmean: True; baseline  
169 subtraction using the average of the first 5 cycles; (Ritz & Spiess, 2008) R package version  
170 1.4-0. 2015) to calculate Ct values. Efficiencies (all > 92%) were calculated using the  
171 calibration curve method. For each gene, the expression was calculated following the formula  
172  $E = (\text{eff}^{\text{Ct}})$ . Expression of the genes of interest was normalised against two housekeeping genes  
173 *Ubiquitin 10 (UBQ10)* and *Tubulin 4 (TUB4)*, as followed  $R_{\text{Gene of Interest}} = E_{\text{Gene of Interest}} / (\text{sqrt}(E_{\text{UBQ10}} * E_{\text{TUB4}}))$ . qPCR primers are listed in Table S1.

174

### 176 *Measurements of cytosolic $\text{Ca}^{2+}$ concentration ( $[\text{Ca}^{2+}]_{\text{cyt}}$ ) in response to mechanical 177 stimulation*

178 Col and *max2* (transformed using floral dip with *Agrobacterium tumefaciens* to express  
179 (apo)aequorin under a 35S promoter, Dodd *et al.*, 2006)) were used at T3 or T4 generation to  
180 determine cytosolic free  $\text{Ca}^{2+}$  concentration ( $[\text{Ca}^{2+}]_{\text{cyt}}$ ). Equivalence of aequorin levels were  
181 determined by discharge assay of luminescence (> 4 million luminescence counts for both Col  
182 and *max2*). Plants were grown vertically on solid medium for 7-8 days as described above.  
183 Excised root tips (1 cm) were placed in the wells (one root per well) of a white 96-well plate  
184 (Greiner Bio-One, UK) and incubated in 100  $\mu\text{L}$  of bathing solution (10  $\mu\text{M}$  coelentraxine, Lux  
185 Biotechnology, UK), 0.1 mM KCl, 10 mM  $\text{CaCl}_2$  and 2 mM bis-Tris propane, pH 5.8 adjusted  
186 with 0.5 M MES) for 2h in the dark, at room temperature. Luminescence was then recorded

187 every second in a plate-reading luminometer (FLUOstar Optima, BMG labtech, Ortenberg,  
188 Germany). After 35 s, 100  $\mu\text{L}$  of bathing solution (without coelentraine) was injected into the  
189 well at 200  $\mu\text{L s}^{-1}$  to cause a mechanical stimulus to the root resulting in a sudden increase in  
190 luminescence (“touch response”). The signal was monitored for a further 120 s, when a 100  $\mu\text{L}$   
191 of discharge solution (3 M  $\text{CaCl}_2$ , in 30% (v/v) ethanol) was delivered to normalize the  
192 luminescence data and calculate  $[\text{Ca}^{2+}]_{\text{cyt}}$  (Laohavisit *et al.*, 2012). The  $[\text{Ca}^{2+}]_{\text{cyt}}$  touch response  
193 of Col and *max2* were then compared.

194

#### 195 *Root gravitropism assays*

196 *Arabidopsis* plants were grown vertically for 14 days on the surface of control medium. On the  
197 day of the experiment, roots were positioned by aligning their root tips so that they could be  
198 imaged together. Plates were then placed vertically in the growth incubator but rotated through  
199 a 90° angle thus inducing a 90° change in gravitropic orientation. Root tips were imaged using  
200 a Raspberry Pi camera module (<http://www.raspberrypi.org/>). Images were acquired every 10  
201 min for 10 h. Image analysis was conducted using ARTT (Russino *et al.*, 2013) which tracked  
202 the root tip growth and gave the tip orientation and displacement as output. Tip orientation was  
203 normalised to the displacement to take into account differences in growth rate.

204

#### 205 *Data representation and statistical analysis*

206 Root skewing data were represented using beanplots constructed in the R environment (R Core  
207 Team, 2012) using the beanplot package (Kampstra, 2014), to show the variability in root  
208 skewing angle. Statistical analyses were also conducted in the R environment. Normal  
209 distribution of the data and equality of variance were verified using Shapiro and Levene tests  
210 (Lawstat package, Gastwirth *et al.*, 2017), respectively. Significant differences amongst  
211 genotypes were verified using one-way Analysis of Variance (ANOVA), followed by Tukey  
212 HSD. ANOVAs were conducted on rank values as a non-parametric method, when data did  
213 not uphold the assumptions of normality and homoscedasticity. All experiments were repeated  
214 at least three times.

215

## 216 **Results**

### 217 **Mutation in *kai2* and *max2* increases root rightward skew**

218 If KL or karrikins were involved in root skewing then insensitive mutants of *Arabidopsis*  
219 *thaliana* would display an aberrant root-skewing phenotype. Vertically-grown *kai2-1* and *kai2-*



220 2 mutants showed significantly increased rightward root skewing compared to the *Ler* wild  
221 type ( $\alpha$ , root tip displacement, viewed from the back of the plate: Fig. 1a, b; Tukey HSD,  $p <$   
222 0.01). Vertically-grown *max2-7* and *max2-8* mutants also showed a significant increase in  
223 rightward root skewing compared to wild type (Fig. 1a, b; Tukey HSD,  $p <$  0.01).

224

225 Horizontal Growth Index (HGI; ratio of root tip displacement along the  $x$  axis to root  
226 length, Grabov *et al.*, 2004; Vaughn & Masson, 2011) was also significantly higher in *kai2-1*,  
227 *kai2-2*, *max2-7*, and *max2-8* compared to wild type (Fig. 1c; Tukey HSD,  $p <$  0.01), supporting  
228 the skewing angle data and showing increased deviation from vertical by mutant roots.  
229 Similarly, the Vertical Growth Index (VGI; ratio of root tip displacement along the  $y$  axis to  
230 root length, Grabov *et al.*, 2004; Vaughn & Masson, 2011) was significantly smaller for *kai2-*  
231 *1*, *kai2-2*, *max2-7*, and *max2-8* compared to wild type (Fig. 1b; Tukey HSD,  $p <$  0.01). In  
232 separate experiments, two complemented *kai2-2* lines (driven by the native promoter  
233 KAI2:KAI2 (*kai2-2*), Waters *et al.*, 2015b) showed significantly decreased root skewing angle  
234 compared to *kai2-2* (Fig. S1a; Tukey HSD,  $p <$  0.05). Overall these data suggest a role for both  
235 KAI2 and MAX2 in root skewing.

236

### 237 **KAI2 and MAX2 operate through the same genetic pathway**

238 Although no physical interaction has been demonstrated between KAI2 and MAX2, they have  
239 been placed in the same signalling pathway through genetic studies of elongated hypocotyl  
240 phenotypes (Waters *et al.*, 2012). Here, the double mutant *kai2-2 max2-8* showed a  
241 significantly increased rightward root skewing compared to wild type (Fig. 2a, b, Tukey HSD,  
242  $p <$  0.05), which was not significantly different from that of *kai2-2* (Fig. 2a, b; Tukey HSD,  
243 *n.s.*). That skewing angle of the *kai2-2 max2-8* double mutant was not greater than that of the  
244 *kai2-2* single mutant suggests that KAI2 and MAX2 operate in the same pathway. Critically,  
245 *dl14* mutants that are insensitive to SL but not KAR (Waters *et al.*, 2012) showed no significant  
246 increase in root skewing compared to wild type (Fig. 2c, d, ANOVA, *n.s.*). A higher root  
247 skewing angle for wild type *Ler* plants compared to *Col* was found, as noted previously  
248 (Vaughn & Masson, 2011). Moreover, the root skewing of *dlk2* mutants (Waters *et al.*, 2012)  
249 was not significantly different to wild type (Fig. S1b; Tukey HSD, *n.s.*). As the DLK2 protein  
250 is related to both KAI2 and D14, overall these data demonstrate a specific role for KAI2 and  
251 MAX2 in the regulation of root skewing and thus implicate KL/KAR sensing through these  
252 proteins.



253

## 254 **KAR<sub>2</sub> reduces root skewing**

255 In the absence of purified and identified KL compounds, the effect of KAR on root skewing  
256 was tested using the potent karrikin KAR<sub>2</sub> (Nelson *et al.*, 2009; Waters *et al.*, 2015a). The  
257 phenotype of *kai2* and *max2* mutants suggests that an impairment in KL perception leads to  
258 greater rightward root skewing. Therefore, an increased availability of KL or its analogue  
259 KAR<sub>2</sub> might compensate for a lowered sensitivity of the system and decrease the rightward  
260 root skewing. Here there was a significant effect of KAR<sub>2</sub> in reducing rightward root skewing  
261 of *Ler* wild type plants with concentrations of 5 and 10  $\mu$ M (Fig. S2a Tukey HSD,  $p < 0.05$ ).  
262 A significant inhibitory effect on primary root elongation of *Ler* plants was evident at 10  $\mu$ M  
263 KAR<sub>2</sub> (Fig. S2b, Tukey HSD,  $p < 0.01$ ).

264 The presence of 2.5 and 5  $\mu$ M KAR<sub>2</sub> in the medium also significantly decreased the  
265 root skewing angle of *kai2-2* (Fig. S2b; Tukey HSD,  $p < 0.05$ ). *kai2* plants seem to be more  
266 sensitive to KAR<sub>2</sub> than *Ler* plants. The KAI2-independent effect of KAR<sub>2</sub> on root skewing  
267 may also be linked to reduced root elongation, as this was significantly lower in the presence  
268 of 5  $\mu$ M KAR<sub>2</sub> (Fig. S2b, Tukey HSD,  $p < 0.01$ ) but not at 2.5  $\mu$ M (Fig. S2b, Tukey HSD,  
269 *n.s.*). It is likely that *kai2* plants are more sensitive to the unspecific toxicity effect of KAR<sub>2</sub>  
270 than *Ler* because they lack a mechanism for degradation of KAR and KL. Similarly, the  
271 presence of 5  $\mu$ M KAR<sub>2</sub> in the medium significantly decreased the root skewing angle of *max2-*  
272  *$\delta$*  (Fig. S2e; Tukey HSD,  $p < 0.01$ ) as well as primary root elongation (Fig. S2f; Tukey HSD,  
273  $p < 0.01$ ).

274

## 275 **GR24<sub>rac</sub> has little effect on root skewing**

276 Because of the structural similarities between KAR and the SL analogue GR24<sub>rac</sub> (Zwanenburg  
277 *et al.*, 2009), and the already established role of GR24<sub>rac</sub> in regulating root growth (Ruyter-  
278 Spira *et al.*, 2011; Kapulnik *et al.*, 2011; Rasmussen *et al.*, 2012), we tested the effect of  
279 GR24<sub>rac</sub> on root skewing. A racemic mix of GR24 (GR24<sub>rac</sub>) that can also be perceived by  
280 KAI2 (Scaffidi *et al.*, 2014; Waters *et al.*, 2015a) was tested at 1 and 5  $\mu$ M as greater  
281 concentrations tend to have a toxicity effect on root growth (Ruyter-Spira *et al.*, 2011).  
282 Treatment with GR24<sub>rac</sub> led to a small increase in rightward root skewing in *Ler* plants at 1  $\mu$ M  
283 (Fig. S3a, Tukey HSD,  $p < 0.01$ ) but not at 5  $\mu$ M GR24<sub>rac</sub> (Tukey HSD, *n.s.*). There was no  
284 significant effect of 1 or 5  $\mu$ M GR24<sub>rac</sub> on *kai2-1* root skewing (Tukey HSD, *n.s.*). There was  
285 no significant effect of 1  $\mu$ M GR24<sub>rac</sub> on root skewing of *kai2-2* (Tukey HSD, *n.s.*) and there

286 was a small but significant decrease in *kai2-2* root skewing with 5  $\mu$ M GR24<sub>rac</sub> (Tukey HSD,  
287  $p < 0.01$ ). There was no significant effect of 1 or 5  $\mu$ M GR24<sub>rac</sub> on the root skewing of Col  
288 plants (Fig. S3b, ANOVA,  $F_{(2,261)}=1.26$ , *n.s.*). There was a small but significant increase in root  
289 skewing angle for *max2-1* plants in the presence of 1  $\mu$ M GR24<sub>rac</sub> (Tukey HSD,  $p < 0.05$ ) but  
290 not 5  $\mu$ M GR24<sub>rac</sub> (Tukey HSD, *n.s.*), while *d14* plants did not respond to the presence of  
291 GR24<sub>rac</sub> (ANOVA,  $F_{(2,184)}=1.31$ , *n.s.*). Overall, GR24<sub>rac</sub> had little effect on root skewing  
292 especially in comparison with the root skewing angles of *kai2* and *max2* mutants, and as such  
293 is a poor KL analogue with regards to the regulation of root skewing.

294

### 295 **MAX2 regulation of skewing operates through SMXL6,7,8 but not SMAX1**

296 The involvement of MAX2 degradation targets, SMAX1 (SUPPRESSOR OF MAX2-1) and  
297 SMXL (SUPPRESSOR OF MAX2-1-LIKE, (Stanga *et al.*, 2013) in regulating root skewing  
298 was examined. D53, a homologue of SMXL6,7,8 in rice, forms a complex with D14 and D3,  
299 and is degraded following SL treatment (Jiang *et al.*, 2013; Zhou *et al.*, 2013). The current  
300 mechanistic model for *Arabidopsis* is that SMAX1 is important for the KL part of the signalling  
301 pathway whereas SMXL6,7,8 are more relevant to the SL part of the pathway (Soundappan *et*  
302 *al.*, 2015).

303 Here we tested the hypothesis that the loss of SMAX1 or SMXL6,7,8 proteins would  
304 affect root skewing. Both *smxl1-2* and *smxl6,7,8* mutants had a significantly decreased skew  
305 compared to wild type (Fig. 3a, b; Tukey HSD,  $p < 0.01$ ), thus suggesting that the abundance  
306 of these proteins is important in regulating the skew. The hypothesis that the MAX2-dependent  
307 regulation of SMAX1 and SMXL6,7,8 protein abundance is relevant to the root skewing  
308 phenotype was then tested. For this, the root skewing angle of the *max2 smxl1-2* double mutant  
309 as well as the quadruple mutant *max2-1 smxl6,7,8* was measured. If MAX2 were to affect root  
310 skewing exclusively through the abundance of SMAX1 or SMXL6,7,8, then the presence of  
311 the *max2* mutation should have no effect on the root skewing phenotype of *smxl1-2* or  
312 *smxl6,7,8*. Here, a significant increase in root skewing angle in the *smxl1-2 max2-1* double  
313 mutant compared to *smxl1* (Tukey HSD,  $p < 0.01$ ) was observed, but there was no further  
314 increase in *max2-1 smxl6,7,8* compared to *smxl6,7,8* (Fig. 3b; Tukey HSD, *n.s.*). Thus, we  
315 conclude that the regulation of root skewing by MAX2 is dependent on SMXL6,7,8 rather than  
316 SMAX1.

317

### 318 **KAI2 and MAX2 negatively regulates both skewing on a tilted surface and waving**

319 Positioning plates at a 45° angle rather than 90° increases root skewing angle. A significant  
320 increase in rightward root skew angle was observed here for the *Ler* wild type grown at a 45°  
321 plate angle (Fig. 4a, b, ANOVA,  $F_{(1,510)}=134.9$ ,  $p < 0.001$ ), whilst *kai2-1*, *kai2-2*, *max2-7*, and  
322 *max2-8* also showed a significantly increased rightward root skewing angle compared to *Ler*  
323 (Fig. 3a,b; Tukey HSD,  $p < 0.01$ ). The increase in mutant root skew relative to wild type was  
324 maintained at the 45° plate angle compared to growth at 90°, indicating that loss of KAI2 or  
325 MAX2 did affect the mutant's ability to sense and respond to the tilt.

326 Although mechanistic models for root skewing vary (Roy & Bassham, 2014), the  
327 rotation of epidermal cell files is considered to be an important feature (Sedbrook *et al.*, 2002;  
328 Oliva & Dunand, 2007; Wang *et al.*, 2011). Right-handed cell file rotation was significantly  
329 increased in both *kai2-2* (mean  $\pm$  SEM  $6.93 \pm 0.44$  cell  $\text{mm}^{-1}$ ; Tukey HSD,  $p < 0.01$ ) and *max2-*  
330 *8* ( $5.13 \pm 0.30$  cell  $\text{mm}^{-1}$ ; Tukey HSD,  $p = 0.08$ ) compared to *Ler* wild type ( $4.24 \pm 0.25$  cell  
331  $\text{mm}^{-1}$ ; Fig. 3c).

332 Increased root skewing is often also accompanied by increased root waving (Roy &  
333 Bassham, 2014) - a decrease in root straightness calculated as the ratio of the cord over the root  
334 length (*i.e.*, straight roots have a ratio of 1 and the lower the ratio the less straight/more wavy  
335 the root; Grabov *et al.*, 2004; Vaughn & Masson, 2011). Growth on a tilted surface can also  
336 decrease straightness (Roy & Bassham, 2014). When grown at 90° plate angle, both *kai2-1* and  
337 *kai2-2* showed a significantly decreased straightness compared to *Ler* wild type (Fig. 4d; Tukey  
338 HSD,  $p < 0.05$ ) and similarly when grown at 45° (Fig. 4d; Tukey HSD,  $p < 0.01$ ). *Ler* was  
339 significantly less straight at 45° compared to 90° (Tukey HSD,  $p < 0.01$ ). These data show that  
340 KAI2 is involved in the negative control of both skewing and waving when plants are grown  
341 vertically and at an angle.

342

### 343 ***kai2* and *max2* can support a normal mechano-sensing transcriptional response**

344 The growth responses of the *kai2* mutants on tilted plates suggested that the mutation does not  
345 affect the root tip's ability to sense the increased mechanical impedance afforded by the  
346 inclined growth medium. Rather, that the *kai2* mutants have an exaggerated root skew when  
347 grown on a tilted surface suggests that downstream responses are impaired. To test for a role  
348 for KAI2 in mechano-sensing responses seedlings were subjected to mechanical stress prior to  
349 determination of root transcript levels of *CML12* and *CML24* (CALMODULIN LIKE  
350 PROTEIN, Fig. 5a). These transcripts are known to increase upon mechanical stimulation  
351 (Braam & Davis, 1990). These tests also addressed *max2* and *d14* in the Col background (Fig.

352 5b). Mechanical stimulation caused significant upregulation of *CML12* and *CML24* transcript  
353 in roots of all genotypes tested (ANOVA,  $p < 0.001$ ) but no mutants responded significantly  
354 differently to their wild type. Thus, the data suggest that root transcriptional mechano-  
355 responsiveness is not drastically altered in either KL- or SL-insensitive mutants.

356

357 As a final test for alteration in mechano-sensing and response, *max2* (as the common  
358 lesion in KL- and SL-pathways) was transformed to express (apo)aequorin as a reporter of  
359 cytosolic free  $\text{Ca}^{2+}$  ( $[\text{Ca}^{2+}]_{\text{cyt}}$ ).  $[\text{Ca}^{2+}]_{\text{cyt}}$  increases transiently in response to mechano  
360 stimulation, acting as a second messenger (Knight *et al.*, 1991). There was no significant  
361 difference between baseline level pre-injection and post-injection for Col (t-test, *n.s.*) or *max2*  
362 (t-test, *n.s.*). There was no significant difference in the amplitude of the touch-induced peak  
363 increase in  $[\text{Ca}^{2+}]_{\text{cyt}}$  between genotypes (Fig. 6; t-test, *n.s.*). However, the total  $\text{Ca}^{2+}$  mobilised  
364 over the recording period (excluding the discharge) for *max2* ( $33.99 \mu\text{Ms} \pm 0.57$ ) was  
365 significantly higher than that for Col ( $29.91 \mu\text{Ms} \pm 0.49$ ; t-test,  $p < 0.01$ ).

366

### 367 ***kai2* has a slower early gravitropic response**

368 Agravitropic mutants can also show an increased root skewing (Okada & Shimura, 1990). To  
369 investigate whether an aberrant gravitropic response of *kai2-2* plants contributed to their  
370 skewing phenotype, root tip orientation was monitored every 10 min after gravistimulation for  
371 10 h. Both *kai2-2* and wild type responded significantly with a change of tip orientation over  
372 time (Fig. 7; ANOVA  $F_{(1,4022)} = 46.8$ ,  $p < 0.001$ ). Comparisons of the responses (normalised  
373 for elongation rate) using ANOVA showed that there was a significant interaction between  
374 time and genotype (ANOVA,  $F_{(1,4022)} = 40.9$ ,  $p < 0.01$ ), indicating a difference in gravitropic  
375 response between genotypes. *kai2-2* root tip angle started to decrease later than *Ler*. After 100  
376 min, the angle of *kai2-2* was significantly higher than that of *Ler* (ANOVA,  $F_{(1,64)} = 4.4$ ,  $p <$   
377  $0.01$ ) but at 600 min there was no significant difference (ANOVA,  $F_{(1,64)} = 0.24$ , *n.s.*). Overall,  
378 the difference in gravitropic response between *kai2-2* and *Ler* may be a small contributory  
379 factor to root skewing, but occurring only in the early stages of the response.

380

### 381 **MAX2 regulation of root skewing involves SKS3 and SKU5**

382 Similarly to the *kai2* and *max2* mutants, mutant plants deficient in the SKU5 protein that is  
383 linked to the plasma membrane by a glycosylphosphatidylinositol (GPI) anchor also showed  
384 an increased rightward root skewing phenotype, increased CFR with no change in gravitropic

385 response (Sedbrook *et al.*, 2002). In our experiments, *sku5* also displayed a rightward skew  
386 when grown vertically that was significantly greater than the wild type (Fig 8b, Tukey HSD,  $p$   
387  $< 0.05$ ). There was no further increase in *sku5 max2* compared to *max2* (Tukey HSD, *n.s.*),  
388 showing that SKU5 and MAX2 can regulate root skewing in the same pathway but as the  
389 skewing angle of the *sku5 max2* mutant was significantly higher than that of *sku5* (Tukey HSD,  
390  $p < 0.001$ ) this suggests that part of the MAX2 pathway is SKU5-independent. The *sks3* (*sku5*  
391 *similar 3*) mutant deficient in a SKU5-related protein also showed a decreased rightward root  
392 skewing (Tukey HSD,  $p < 0.05$ ) that was maintained even in the absence of MAX2  
393 (comparison *sks3: sks3 max2-1*, Tukey HSD, *n.s.*). These data suggest that the abundance of  
394 SKS3 protein may itself regulate root skewing and that the abundance of this protein may be  
395 regulated through the MAX2 pathway. *sks3* and *sku5* do suppress the high LRD of *max2*  
396 mutants (Fig. S4) as well as the decreased germination rate (Fig. S5). Thus, our data suggest  
397 that members of the SKU/SKS at least SKS3 are degradation targets for the MAX2 pathway,  
398 and in the case of SKS3 specifically regulating of root skewing. The genetic link established  
399 here between MAX2 and SKU/SKS family points towards a role of MAX2 in regulating,  
400 through SKS3, a cell wall-dependent process.

401

#### 402 **KAI2 and MAX2 positively regulate root diameter**

403 Given the subtle responses in terms of gravitropism and mechanical stimulation versus the clear  
404 increase in CFR and link with members of the SKU/SKS family, we hypothesise that in both  
405 the *kai2* and *max2* mutants the root skewing phenotype arises due to a restriction of cell growth.  
406 This is supported by our finding that the mean root diameter of the mutants was significantly  
407 narrower than that of wild type (Fig. S6, *Ler*  $166.43 \mu\text{m} \pm 1.79$ , *kai2-2*  $155.57 \mu\text{m} \pm 1.41$ ,  
408 *max2-8*  $146.59 \mu\text{m} \pm 1.67$ ; Tukey HSD  $p < 0.001$ ), suggesting that root radial expansion may  
409 be restricted.

410

#### 411 **Discussion**

412 Evidence here demonstrating a role for KAI2 and MAX2 in regulating root skewing and  
413 waving in *Arabidopsis* reinforces the idea that plant endogenous KL can act as a phytohormone  
414 (Conn & Nelson, 2016). This is the first root growth phenotype characterised for karrikin-  
415 insensitive mutants in a non-host species (Gutjahr *et al.* 2015).

416

#### 417 **KAI2 and MAX2 as new regulatory components for root skewing**

418 The characterization of different root skewing and waving abilities amongst *Arabidopsis*  
419 ecotypes strongly suggests that the surface-dependent growth patterns represent an adaptive  
420 response relevant to natural soil conditions (Vaughn & Masson, 2011; Schultz *et al.*, 2017).  
421 Mutants have proved useful in identifying new components of the machinery regulating root  
422 skewing in *Arabidopsis*. Here the increased root skewing phenotype of *kai2* and *max2* suggests  
423 that both KAI2 and MAX2 negatively regulate root skewing. Since these two proteins are  
424 involved in the perception of KAR and KL this provides evidence supporting a role for KL in  
425 regulating root skewing. Previous studies have shown an involvement of the SL pathway in the  
426 regulation of root system architecture (although skewing and waving were not reported)  
427 (Ruyter-Spira *et al.*, 2011; Kapulnik *et al.*, 2011; Rasmussen *et al.*, 2012). We found no  
428 evidence supporting a role for endogenous SL in root skewing, since the *d14* mutant impaired  
429 in the perception of SL does not show a root skewing phenotype.

430 For phenotypes such as elongated hypocotyls or increased seed dormancy (Waters *et*  
431 *al.*, 2012), KAR<sub>2</sub> acts as a good synthetic analogue for KL (Conn & Nelson, 2016). However,  
432 this is not the case for root skewing, in which a high concentration of KAR<sub>2</sub> is necessary to  
433 induce a phenotype and is KAI2 independent. A similarly high (10 µM) concentration of the  
434 less potent KAR<sub>1</sub> could also induce a KAI2-dependent reduction in hypocotyl length (Waters  
435 *et al.*, 2012). KAR<sub>1</sub> is also less potent than KAR<sub>2</sub> in targeting the degradation of KAI2 protein  
436 (Waters *et al.*, 2015a). Results here suggest that KL represent a family of related compounds  
437 that can regulate different aspects of plant development, and that the KL responsible for  
438 regulating root skewing may differ from the KL responsible for regulating hypocotyl  
439 elongation and seed germination. Many SL compounds have been purified thus far  
440 (Bouwmeester *et al.*, 2007), perhaps structural diversity is also the case for KL. Although  
441 KAR<sub>2</sub> can regulate root skewing, the high concentration required plus the independence from  
442 KAI2 and MAX2 suggest that KAR<sub>2</sub> is likely non-specific and does not represent a good  
443 analogue of KL.

444

#### 445 **Root skewing phenotype suggests new links between MAX2 and SKS proteins**

446 The mechanism by which KAI2 and MAX2 regulates root skewing remains elusive but must  
447 involve a differential growth leading to increased epidermal cell file rotation. We found no  
448 evidence supporting a role for KAI2 and MAX2 in regulating the root mechano-sensing  
449 transcriptional response and only a very subtle effect of MAX2 on mechano-stimulated  
450  $[Ca^{2+}]_{cyt}$  response. The link established here between MAX2 and SKU5 as well as MAX2 and  
451 SKS3 suggests the possibility that the *max2* skewing phenotype is linked to cell wall



452 modification or integrity. Amongst the 11 highly probable skew gene candidates identified in  
453 *Arabidopsis* roots using microarrays, three were associated to the cell wall either because of  
454 their physical location (*PAP24*), or because of their role in cell wall integrity (*DIN2*) or  
455 formation (*MIOX4*, Schultz *et al.*, 2017). *SKS15* also presented an expression pattern indicative  
456 of a possible role in root skewing in this study. However, analysis of the cell wall composition  
457 using Fourier transform infrared spectroscopy and analysis of neutral sugars revealed no  
458 differences between *sku5* mutant and wild type (Sedbrook *et al.*, 2002).

459 Several lines of evidence suggest that KL and KAR affect cell wall composition. First,  
460 amongst the 133 genes that are differentially regulated 24h post-imbibition with 1  $\mu$ M KAR<sub>1</sub>,  
461 11 relate to cell wall (Nelson *et al.*, 2010). Genes annotated as being part of the ‘plant-cell type  
462 cell wall’ category of the GO cellular component were significantly enriched in the set of genes  
463 regulated by KAR<sub>1</sub>. Amongst those genes, *sks17* (*SKU5 similar 17*) was found to be  
464 upregulated 2.2-fold upon treatment with KAR<sub>1</sub>. It is unclear whether the levels of proteins  
465 also increase upon treatment with KAR<sub>1</sub>. Second, metabolomic analyses showed reduced levels  
466 of flavonoids contributing to lignin composition (including *p*-coumaric acids and ferulic acids)  
467 in *max2* roots compared to wild type roots under control conditions (Walton *et al.*, 2016). These  
468 are also good indicators of lower levels of cutin monomer, which signals in the AM-root  
469 symbiosis (Wang *et al.* 2012). Thus, an altered cell wall would fit with the impairment in the  
470 early events leading to the establishment of KAI2-dependent AM symbiosis in host species  
471 (Gutjahr *et al.*, 2015) and could feasibly influence root skewing and waving.

472

### 473 **Root skewing phenotype challenges the current model for the SMXLs**

474 Soundappan *et al.* (2015) suggested specific relationships between SMAX1 and KAI2-KAR/  
475 KL-regulated growth and between SMXL6,7,8 and D14-SL- regulated growth. However, data  
476 here do not support the idea that there is a clear dichotomy in terms of the degradation-target  
477 proteins involved in the perception pathways for SL and KL. Rather the data support a role for  
478 MAX2 in regulating the skew in a D14-independent pathway through SMXL6,7,8 rather than  
479 SMAX1. However, this is complicated by the fact that SMAX1 itself appears to regulate root  
480 skewing. One explanation for this observation might be that SMAX1 regulates the skew  
481 indirectly via the regulation of SMX6,7,8. In this scenario, the *smx1-2* mutant has a skewing  
482 phenotype because of a decreased level of SMXL6,7,8, proteins. The lack of direct effect of  
483 SMAX1 on root skewing is also supported by the fact that there is no further increase in root  
484 skewing in the *smxl6,7,8 max2* mutant compared to *smxl6,7,8*. In the quadruple mutant SMAX1

485 protein levels should be different because SMAX1 is regulated through MAX2 (Stanga *et al.*,  
486 2013; Soundappan *et al.*, 2015). Similarly, the level of SMXL6,7,8 should be higher in the  
487 *smax1-2 max2-1* compared to *smax1-2*, thus leading to the observed increase in root skewing  
488 and supporting a role for SMXL6,7,8 in regulating root skewing.

489 In addition, a role was found for KAI2 and MAX2 but not D14 in regulating root  
490 skewing. Overall, this suggests that with regards to the regulation of root growth patterns,  
491 SMXL6,7,8 as well as SMAX1 may be involved in the MAX2-dependent regulation of  
492 skewing, which was also found to be KL-dependent rather than SL-dependent. Much may  
493 depend on the spatial localisation of proteins. SMAX1 is expressed in the root cap, while  
494 SMXL6, 7 and 8 are also present in the vasculature or mature roots (Soundappan *et al.*, 2015).  
495 *KAI2* expression could be found preferentially in the vasculature (Brady *et al.*, 2007)  
496 potentially favouring interaction with SMXL6, 7 or 8.

497

## 498 **Conclusions**

499 Root positioning in the soil is critical in terms of regulating access to nutrients and water, but  
500 also interaction with neighbours (Fang *et al.*, 2013). The regulation of root positioning is  
501 dependent on both the genetic and environmental response. While it is difficult to argue for the  
502 field-relevance of root skewing patterns observed on the surface of agar plates, the  
503 characterization of different root skewing and waving abilities amongst *Arabidopsis* ecotypes  
504 strongly suggests that the surface-dependent growth patterns represent an adaptive response  
505 relevant to natural soil conditions (Vaughn & Masson, 2011). The involvement of both KAI2  
506 and MAX2 suggests a role for a potential new phytohormone KL, in regulating root skewing  
507 and waving.

508

## 509 **Acknowledgments**

510 We thank Dr. Mark Waters and Prof. Dame Ottoline Leyser for providing seeds and  
511 commenting on the manuscript. Thank you also to Prof. David Nelson for providing seeds and  
512 Daniel Safka for support in setting up the raspberry Pi system. We are grateful to Dr. Uta  
513 Paszkowski, Prof. Alex Webb, Dr. Siobhan Braybrook, Prof. Sidney Shaw and Dr. Jenny  
514 Mortimer for interesting discussions. Work was supported by the Broodbank Trust, the Newton  
515 Trust, the Gatsby Foundation, and the BBSRC Doctoral Training Programme (BB/J014540/1)

516

## 517 **Authors Contribution**

518 S.M.S. and J.M.D. planned and designed the research. S.M.S., Y.G., E.M. and F.J. performed  
519 experiments and analysed data. S.M.S. and J.M.D. wrote the manuscript.

520

## 521 **Conflict of interest**

522 The authors have no conflict of interest to declare.

523

524 **Table S1:** Primer sequences used in qPCR analysis.

| Gene         | Direction | Sequence                          |
|--------------|-----------|-----------------------------------|
| <i>CML12</i> | Forward   | 5'-AAGCCTTCCGCGTATTCGACAAGAA-3'   |
| <i>CML12</i> | Reverse   | 5'-CACAAACTCAGAGAAACTGATGGTTCC-3' |
| <i>CML24</i> | Forward   | 5'-GAGTAATGGTGGTGGTGGTGGTGA-3'    |
| <i>CML24</i> | Reverse   | 5'-ACGAATCATCACCGTCGACTAA-3'      |
| <i>UBQ10</i> | Forward   | 5'-CCGACTACAACATTCAGAAGGA-3'      |
| <i>UBQ10</i> | Reverse   | 5'-TCAGAACTCTCCACCTCCAAA-3'       |
| <i>TUB4</i>  | Forward   | 5'-CTGTTTCCGTACCCTCAAGC-3'        |
| <i>TUB4</i>  | Reverse   | 5'-AGGGAAACGAAGACAGCAAG-3'        |

525

526

527

528

## 529 **References:**

530 **Bouwmeester HJ, Roux C, Lopez-Raez JA, Bécard G. 2007.** Rhizosphere communication  
531 of plants, parasitic plants and AM fungi. *Trends in Plant Science* **12**: 224–230.

532 **Braam J, Davis RW. 1990.** Rain-, Wind-, and Touch-Induced Expression of Calmodulin and  
533 Calmodulin-Related Genes in *Arabidopsis*. *Cell* **60**: 357–364.

534 **Brady S, Orlando D, Lee J, Wang J, Koch J, Dinneny J, Mace D, Ohler U, Benfey P.**  
535 **2007.** A high-resolution root spatiotemporal map reveals dominant expression patterns.  
536 *Science* **318**: 801–806.

537 **Buer CS, Masle J, Wasteneys GO. 2000.** Growth conditions modulate root-wave  
538 phenotypes in *Arabidopsis*. *Plant Cell Physiology* **41**: 1164–1170.

539 **Buer CS, Wasteneys GO, Masle J. 2003.** Ethylene modulates root-wave responses in  
540 *Arabidopsis*. *Plant Physiology* **132**: 1085–1096.

541 **Bythell-Douglas R, Waters MT, Scaffidi A, Flematti GR, Smith SM, Bond CS. 2013.** The  
542 structure of the karrikin-insensitive protein (KAI2) in *Arabidopsis thaliana*. *PLoS ONE* **8**:  
543 e54758.

544 **Chevalier F, Nieminen K, Sanchez-Ferrero JC, Rodriguez ML, Chagoyen M, Hardtke**  
545 **CS, Cubas P. 2014.** Strigolactone promotes degradation of DWARF14, an  $\alpha/\beta$  Hydrolase  
546 Essential for Strigolactone Signaling in *Arabidopsis*. *The Plant Cell* **26**: 1134–1150.

- 547 **Conn CE, Nelson DC. 2016.** Evidence that KARRIKIN-INSENSITIVE2 (KAI2) receptors  
548 may perceive an unknown signal that is not karrikin or strigolactone. *Frontiers in Plant*  
549 *Science* **6**: 1219.
- 550 **Darwin C, Darwin F. 1880.** *The power of movement in plants*. New, York: D. Appleton and  
551 Company.
- 552 **Dodd AN, Jakobsen MK, Baker AJ, Telzerow A, Hou S-W, Laplaze L, Barrot L, Scott**  
553 **Poethig R, Haseloff J, Webb AAR. 2006.** Time of day modulates low-temperature Ca<sup>2+</sup>  
554 signals in *Arabidopsis*. *The Plant Journal* **48**: 962–973.
- 555 **Fang S, Clark RT, Zheng Y, Iyer-Pascuzzi AS, Weitz JS, Kochian LV, Edelsbrunner H,**  
556 **Liao H, Benfey PN. 2013.** Genotypic recognition and spatial responses by rice roots.  
557 *Proceedings of the National Academy of Sciences* **110**: 2670–2675.
- 558 **Flematti GR, Dixon KW, Smith SM. 2015.** What are karrikins and how were they  
559 ‘discovered’ by plants? *BMC Biology* **13**: 108.
- 560 **Gastwirth JL, Gel YR, Hui W, Lyubchich V, Miao W. 2017.** Tools for Biostatistics,  
561 Public Policy and Law. *R package version*. 1–44.
- 562 **Grabov A, Ashley MK, Rigas S, Hatzopoulos P, Dolan L, Vicente-Agullo F. 2004.**  
563 Morphometric analysis of root shape. *New Phytologist* **165**: 641–652.
- 564 **Gutjahr C, Gobbato E, Choi J, Riemann M, Johnson MG, Summers W, Carbonnel S,**  
565 **Mansfield C, Yang S-Y, Nadal M, et al. 2015.** Rice perception of symbiotic arbuscular  
566 mycorrhizal fungi requires the karrikin receptor complex. *Science* **350**: 1516–1521.
- 567 **Hamiaux C, Drummond RSM, Janssen BJ, Ledger SE, Cooney JM, Newcomb RD,**  
568 **Snowden KC. 2012.** DAD2 is an alpha/beta; hydrolase likely to be involved in the  
569 perception of the plant branching hormone, strigolactone. *Current Biology* **22**: 2032–2036.
- 570 **Jiang L, Liu X, Xiong G, Liu H, Chen F, Wang L, Meng X, Liu G, Yu H, Yuan Y, et al.**  
571 **2013.** DWARF 53 acts as a repressor of strigolactone signalling in rice. *Nature* **504**: 401–  
572 405.
- 573 **Kampstra P. 2014.** Beanplot: A Boxplot Alternative for Visual Comparison of Distributions.  
574 *Journal of Statistical Software, Code Snippets* **28**: 1–9.
- 575 **Kapulnik Y, Delaux P-M, Resnick N, Mayzlish-Gati E, Wininger S, Bhattacharya C,**  
576 **Séjalon-Delmas N, Comber J-P, Bécard G, Belausov E, et al. 2011.** Strigolactones affect  
577 lateral root formation and root-hair elongation in *Arabidopsis*. *Planta* **233**: 209–216.
- 578 **Knight M, Campbell AK, Smith SM, Trewavas A. 1991.** Transgenic plant aequorin reports  
579 the effects of touch and cold-shock and elicitors on cytoplasmic calcium. *Nature* **352**: 524–  
580 526.
- 581 **Kushwah S, Jones AM, Laxmi A. 2011.** Cytokinin interplay with ethylene, auxin, and  
582 glucose signaling controls *Arabidopsis* seedling root directional growth. *Plant Physiol* **156**:  
583 1851–1866.
- 584 **Lanza M, Garcia-Ponce B, Castrillo G, Catarecha P, Sauer M, Rodriguez-Serrano M,**

- 585 **Páez-García A, Sánchez-Bermejo E, TC M, del Puerto YL, et al. 2012.** Role of actin  
586 cytoskeleton in brassinosteroid signaling and in its integration with the auxin response in  
587 plants. *Developmental Cell* **22**: 1275–1285.
- 588 **Laohavisit A, Shang Z, Rubio L, Cuin TA, Very AA, Wang A, Mortimer JC,**  
589 **Macpherson N, Coxon KM, Battey NH, et al. 2012.** Arabidopsis Annexin1 Mediates the  
590 Radical-Activated Plasma Membrane Ca<sup>2+</sup> and K<sup>+</sup>-Permeable Conductance in Root Cells.  
591 *The Plant Cell* **24**: 1522-1533.
- 592 **Meijering E, Jacob M, C J, Sarria F, Steiner P, Hirling H, Unser M. 2004.** Design and  
593 validation of a tool for neurite tracing and analysis in fluorescence microscopy Images. 1–14.
- 594 **Nelson DC, Flematti GR, Riseborough JA, Ghisalberti EL, Dixon KW, Smith SM. 2010.**  
595 Karrikins enhance light responses during germination and seedling development in  
596 *Arabidopsis thaliana*. *Proceedings of the National Academy of Sciences* **107**: 7095–7100.
- 597 **Nelson DC, Riseborough JA, Flematti GR, Stevens J, Ghisalberti EL, Dixon KW, Smith**  
598 **SM. 2009.** Karrikins discovered in smoke trigger *Arabidopsis* seed germination by a  
599 mechanism requiring gibberellic acid synthesis and light. *Plant Physiology* **149**: 863–873.
- 600 **Okada K, Shimura Y. 1990.** Reversible root tip rotation in *Arabidopsis* seedlings induced  
601 by obstacle-touching stimulus. *Science* **250**: 274–276.
- 602 **Oliva M, Dunand C. 2007.** Waving and skewing: how gravity and the surface of growth  
603 media affect root development in *Arabidopsis*. *New Phytologist* **176**: 37–43.
- 604 **Rasmussen A, Mason MG, De Cuyper C, Brewer PB, Herold S, Agusti J, Geelen D,**  
605 **Greb T, Goormachtig S, Beeckman T, et al. 2012.** Strigolactones suppress adventitious  
606 rooting in *Arabidopsis* and pea. *Plant Physiology* **158**: 1976–1987.
- 607 **Ritz C, Spiess AN. 2008.** qpcR: an R package for sigmoidal model selection in quantitative  
608 real-time polymerase chain reaction analysis. *Bioinformatics* **24**: 1549–1551.
- 609 **Roy R, Bassham DC. 2014.** Root growth movements: Waving and skewing. *Plant Science*  
610 **221-222**: 42–47.
- 611 **Russino A, Ascrizzi A, Popova L, Tonazzini A, Mancuso S, Mazzolai B. 2013.** A novel  
612 tracking tool for the analysis of plant-root tip movements. *Bioinspiration & Biomimetics* **8**:  
613 025004–16.
- 614 **Ruyter-Spira C, Kohlen W, Charnikhova T, Van Zeijl A, Van Bezouwen L, De Ruijter**  
615 **N, Cardoso C, Lopez-Raez JA, Matusova R, Bours R, et al. 2011.** Physiological effects of  
616 the synthetic strigolactone analog GR24 on root system architecture in *Arabidopsis*: another  
617 belowground role for strigolactones? *Plant Physiology* **155**: 721–734.
- 618 **Scaffidi A, Waters MT, Sun YK, Skelton BW, Dixon KW, Ghisalberti EL, Flematti GR,**  
619 **Smith SM. 2014.** Strigolactone hormones and their stereoisomers signal through two related  
620 receptor proteins to induce different physiological responses in *Arabidopsis*. *Plant*  
621 *Physiology* **165**: 1221–1232.
- 622 **Schneider CA, Rasband WS, Eliceiri KW. 2012.** NIH Image to ImageJ: 25 years of image  
623 analysis. *Nature Methods* **9**: 671–675.



- 624 **Schultz ER, Zupanska AK, Sng NJ, Paul A-L, Ferl RJ. 2017.** Skewing in *Arabidopsis*  
625 roots involves disparate environmental signaling pathways. *BMC Plant Biology* **17**: 31.
- 626 **Sedbrook JC, Carroll KL, Hung KF, Masson PH, Somerville C. 2002.** The arabidopsis  
627 SKU5 gene encodes an extracellular glycosyl phosphatidylinositol-anchored glycoprotein  
628 involved in directional root growth. *The Plant Cell* **14**: 1635–1648.
- 629 **Shih H-W, Miller ND, Dai C, Spalding EP, Monshausen GB. 2014.** The receptor-like  
630 kinase FERONIA is required for mechanical signal transduction in *Arabidopsis* seedlings.  
631 *Current biology* **24**: 1887–1892.
- 632 **Soundappan I, Bennett T, Morffy N, Liang Y, Stanga JP, Abbas A, Leyser O, Nelson**  
633 **DC. 2015.** SMAX1-like/D53 family members enable distinct MAX2-dependent responses to  
634 strigolactones and karrikins in *Arabidopsis*. *The Plant Cell* **27**: 3143–3159.
- 635 **Stanga JP, Smith SM, Briggs WR, Nelson DC. 2013.** SUPPRESSOR OF MORE  
636 AXILLARY GROWTH2 1 Controls Seed Germination and Seedling Development in  
637 *Arabidopsis*. *Plant Physiology* **163**: 318–330.
- 638 **Thompson MV, Holbrook NM. 2004.** Root-gel interactions and the root waving behavior of  
639 *Arabidopsis*. *Plant Physiology* **135**: 1822–1837.
- 640 **Vaughn LM, Masson PH. 2011.** A QTL study for regions contributing to *Arabidopsis*  
641 *thaliana* root skewing on tilted surfaces. *Genes Genomes Genetics* **1**: 105–115.
- 642 **Walton A, Stes E, Goeminne G, Braem L, Vuylsteke M, Matthys C, De Cuyper C, Staes**  
643 **A, Vandebussche J, Boyer F-D, et al. 2016.** The response of the root proteome to the  
644 synthetic strigolactone GR24 in *Arabidopsis*. *Molecular & Cellular Proteomics* **15**: 2744–  
645 2755.
- 646 **Wang Y, Wang B, Gilroy S, Wassim Chehab E, Braam J. 2011.** CML24 is involved in  
647 root mechanoresponses and cortical microtubule orientation in *Arabidopsis*. *Journal of Plant*  
648 *Growth Regulation* **30**: 467–479.
- 649 **Waters MT, Gutjahr C, Bennett T, Nelson DC. 2017.** Strigolactone signaling and  
650 evolution. *Annual Review of Plant Biology* **68**: 291–322.
- 651 **Waters MT, Nelson DC, Scaffidi A, Flematti GR, Sun YK, Dixon KW, Smith SM. 2012.**  
652 Specialisation within the DWARF14 protein family confers distinct responses to karrikins  
653 and strigolactones in *Arabidopsis*. *Development* **139**: 1285–1295.
- 654 **Waters MT, Scaffidi A, Flematti G, Smith SM. 2015a.** Substrate-induced degradation of  
655 the a/b-fold hydrolase KARRIKIN INSENSITIVE2 requires a functional catalytic triad but is  
656 independent of MAX2. *Molecular Plant* **8**: 814–817.
- 657 **Waters MT, Scaffidi A, Moulin SLY, Sun YK, Flematti GR, Smith SM. 2015b.** A  
658 *Selaginella moellendorffii* ortholog of KARRIKIN INSENSITIVE2 functions in *Arabidopsis*  
659 development but cannot mediate responses to karrikins or strigolactones. *The Plant Cell* **27**:  
660 1925–1944.
- 661 **Yao R, Ming Z, Yan L, Li S, Wang F, Ma S, Yu C, Yang M, Chen L, Chen L, et al.**  
662 **2016.** DWARF14 is a non-canonical hormone receptor for strigolactone. *Nature* **536**: 469–



663 473.

664 **Zhao L-H, Zhou XE, Yi W, Wu Z, Liu Y, Kang Y, Hou L, de Waal PW, Li S, Jiang Y,**  
665 ***et al.* 2015.** Destabilization of strigolactone receptor DWARF14 by binding of ligand and E3-  
666 ligase signaling effector DWARF3. *Cell Research* **25**: 1219–1236.

667 **Zhou F, Lin Q, Zhu L, Ren Y, Zhou K, Shabek N, Wu F, Mao H, Dong W, Gan L, *et al.***  
668 **2013.** D14-SCFD3-dependent degradation of D53 regulates strigolactone signalling. *Nature*  
669 **504**: 406–410.

670 **Zwanenburg B, Mwakaboko AS, Reizelman A, Anilkumar G, Sethumadhavan D. 2009.**  
671 Structure and function of natural and synthetic signalling molecules in parasitic weed  
672 germination. *Pest Management Science* **65**: 478–491.

673

674

675 **Figure legends:**

676 **Fig.1. *kai2* and *max2* mutants display an exaggerated rightward root skewing phenotype.**

677 A. Seedlings of *kai2-1*, *kai2-2*, *max2-7*, and *max2-8*, displayed an exaggerated rightward skew  
678 when grown at 90°. The scale bar represents 1 cm. B. The root skewing angle ( $\alpha$ ) was measured  
679 as the deviation from the vertical for plants grown at a 90° angle. C. The increased root skewing  
680 of karrikin-insensitive mutants measured as the simple deviation from the vertical could also  
681 be noted when measured as an increase in horizontal growth index (HGI) or (D) a decrease in  
682 vertical growth index (VGI). Data for each genotype are displayed as a beanplot with the  
683 skewing angle of individual roots shown as dark green horizontal lines, while the mean is  
684 represented by a thick black horizontal line. The estimated density of the distribution is  
685 illustrated by the shaded colour. The dashed line corresponds to the mean for the wild type.  
686 Positive values are rightward skews. \* indicates significant difference compared to wild type  
687 (Tukey HSD,  $p < 0.05$ ). For each genotype,  $n > 65$  in 3 separate experiments.

688

689 **Fig. 2. KAI2 and MAX2 regulate root skewing through the same pathway, which does**  
690 **not involve D14**

691 A. Seedlings for the double mutant *kai2-2/max2-8* showed no further increase in root skewing  
692 angle compared to *kai2-2* (B). The scale bar indicates 1 cm. Data for each genotype are  
693 displayed as a beanplot with the skewing angle of individual roots shown as dark green  
694 horizontal lines, while the mean is represented by a thick black horizontal line. The estimated  
695 density of the distribution is illustrated by the shaded colour. The dashed line corresponds to

696 the mean for the wild type. \* indicates significant difference compared to wild type (Tukey  
697 HSD,  $p < 0.05$ ). For each genotype,  $n > 66$  in 5 separate experiments. C. Seedlings for the SL-  
698 insensitive mutant *Atdl4* showed no increased rightward root skewing, and the measured  
699 skewing angle was not significantly different from that of the wild type (D). For each genotype,  
700  $n > 73$  from 3 experiments.

701

702 **Fig. 3. Involvement of SMAX1 and SMXLs in root skewing.**

703 A. Seedlings for Col, *max2-1*, *smax2-1*, *smax2-1/max2-1*, *smxl6,7,8* and *smxl6,7,8/max2-1*  
704 showing root skewing while grown at 90°. The scale bar represents 1 cm. B. Data for each  
705 genotype are displayed as a beanplot with the skewing angle of individual roots shown as dark  
706 green horizontal lines, while the mean is represented by a thick black horizontal line. The  
707 estimated density of the distribution is illustrated by the shaded colour. The dashed line  
708 corresponds to the mean for the wild type. \* indicates a significant difference compared to wild  
709 type (Tukey HSD,  $p < 0.05$ ). For each genotype,  $n > 58$  from 6 experiments.

710

711 **Fig. 4. *kai2* and *max2* increased rightward root skewing when placed at 45°.**

712 A. Seedlings of *kai2-1*, *kai2-2*, *max2-7*, and *max2-8*, displayed an exaggerated rightward skew  
713 when grown vertically for six days then placed at 45° for 3 days. The scale bar represents 1cm.  
714 B. The root skewing angle ( $\alpha$ ) was measured as the deviation from the vertical for plants grown  
715 at a 45° angle for 3 days. C. Both *max2-8* and *kai2-2* mutants show increased cell file rotation  
716 (CFR) indicating that the root epidermal cells were twisting more compared to those of the  
717 wild type. CFR was measured as the number of epidermal cells that crossed a 1 mm line 1.5 to  
718 2 mm from the root tip. Plants were grown at 45°. Data shown as mean  $\pm$  SE,  $n = 28-42$  plants  
719 obtained in 4 separate experiments. Letters indicate significant differences (Tukey HSD,  $p <$   
720  $0.05$ , except for the comparison *Ler-max2-7* where the difference was significant at the 10%  
721 limit, pairwise  $t$ -test,  $p < 0.05$ ). The scale bar indicates 500  $\mu$ m. D. The straightness (measured  
722 as the ratio of the chord Lc to root length L; Grabov *et al.*, 2004; Vaughn & Masson, 2011) of  
723 seedling roots from wild type, *kai2-1* and *kai2-2* decreased when plants were grown at 45°  
724 compared to 90° (shown in brackets behind genotype). Data for each genotype are displayed  
725 as a beanplot with the straightness of individual roots shown as dark green horizontal lines,  
726 while the mean is represented by a thick black horizontal line. The estimated density of the  
727 distribution is illustrated by the shaded colour. The dashed line corresponds to the mean for the  
728 wild type. \* indicates significant difference at the 5% level compared to wild type grown at

729 90°, while ‡ indicates a significant difference to wild type grown at 45°. For each genotype,  $n$   
730 > 58 in 3 separate experiments.

731

732 **Fig. 5. *kai2*, *max2*, *d14* mutants support normal transcriptional response to mechano-**  
733 **stimulus.**

734 Karrikin- and SL-insensitive mutants showed a normal response to mechanical stimulation at  
735 the transcript level. Nine day-old seedlings of wild type and mutants *kai2-1* and *kai2-2* (A),  
736 and *d14*, *max2-1* (B) were mechanically stimulated (MS) for 30 seconds, then collected 30 min  
737 later for transcript analysis of touch-sensitive genes *CML12* and *CML24*, relative to  
738 housekeeping genes *Tubulin 4* and *Ubiquitin 10*. The means of 6-9 replicates from 3  
739 independent experiments are shown, each replicate based on the RNA extracted from roots of  
740 30 to 40 seedlings. Data are shown as mean  $\pm$  SE, letters indicate significant differences (Tukey  
741 HSD,  $p < 0.05$ ).

742

743 **Fig. 6. Mechano-stimulated  $[Ca^{2+}]_{cyt}$  increase in *max2* root tips.** Individual excised root tips  
744 of Col and *max2* expressing (apo)aequorin as a  $[Ca^{2+}]_{cyt}$  reporter were mechanically stimulated  
745 by addition of buffer at 35s. The mean  $\pm$  SE of 40 to 67 roots in 5 independent trials are shown.  
746 Inset: Mean  $\pm$  SE maximal  $[Ca^{2+}]_{cyt}$  increment in response to stimulus (peak response minus  
747 baseline).

748

749 **Fig. 7. Gravitropic response of *kai2* is slower than wild type's.**

750 The tip orientation of roots from wild type and *kai2-2* was recorded every 10 min and for 10 h  
751 after a change in gravitropic orientation. The change in tip orientation was normalised to the  
752 tip displacement to take into account differences in growth rate between genotype. Data are  
753 shown as mean  $\pm$  SE,  $n = 16-22$  plants obtained in 5 experiments.

754

755 **Fig. 8. MAX2 regulation of root skewing involves SKS3 and SKU5**

756 A. Seedlings of Col, *max2-1*, *sks3*, *sks3/max2-1*, *sku5*, *sku5/max2-1* mutants grown at 90°. The  
757 scale bar represents 1 cm. B. Data for each genotype are displayed as a beanplot with the  
758 skewing angle of individual roots shown as dark green horizontal lines, while the mean is  
759 represented by a thick black horizontal line. The estimated density of the distribution is  
760 illustrated by the shaded colour. The dashed line corresponds to the mean for the wild type. \*  
761 indicates a significant difference compared to wild type (Tukey HSD,  $p < 0.05$ ). For each  
762 genotype,  $n > 34$  in 3 separate experiments.

763

764 Fig. S1. The root skewing angle of complemented lines of the *kai2-2* mutant was reduced  
765 compared to the *kai2-2* mutant but remained higher than that of the *Ler* wild type (A). 10G and  
766 12H are *kai2-2* lines complemented by *KAI2* expression under the native promoter. Data for  
767 each genotype are displayed as a beanplot with the skewing angle of individual roots shown as  
768 dark green horizontal lines, while the mean is represented by a thick black horizontal line. The  
769 estimated density of the distribution is illustrated by the shaded colour. The dashed line  
770 corresponds to the mean for the wild type. \* indicates a significant difference compared to wild  
771 type (Tukey HSD,  $p < 0.05$ ) while ‡ indicates a significant difference compared to *kai2-2*  
772 (Tukey HSD,  $p < 0.05$ ). For each genotype,  $n > 48$  in 4 separate experiments. (B) The root  
773 skewing angle of seedlings for three mutant alleles of *dlk2* showed no further increased  
774 compared to wild type. There is no significant difference between root skewing angle of *dlk2*  
775 alleles and wild type (Tukey HSD, *n.s.*). For each genotype,  $n > 98$  in 4 separate experiments.  
776

777 Fig. S2. Effect of KAR<sub>2</sub> on root skewing and primary root elongation in *kai2* and *max2*. Root  
778 skewing angle of *Ler* (A) and *kai2-2* (C) plants grown under control conditions or in the  
779 presence of 2.5, 5 or 10  $\mu\text{M}$  KAR<sub>2</sub> in the medium and, *max2-8* (E) grown under control  
780 conditions or in the presence of 5  $\mu\text{M}$  KAR<sub>2</sub> in the medium. Root elongation over a three-day  
781 period when *Ler* (B), *kai2-2* (D) and *max2-8* (F) plants were exposed to KAR<sub>2</sub>. Data for each  
782 genotype are displayed as a beanplot with the skewing angle of individual roots shown as dark  
783 green (or purple for the root elongation data) horizontal lines, while the mean is represented by  
784 a thick black horizontal line. The estimated density of the distribution is illustrated by the  
785 shaded colour. The dashed line corresponds to the mean for the control conditions. \* indicates  
786 a significant difference compared to control conditions (Tukey HSD,  $p < 0.05$ ). For each  
787 treatment and genotype combination,  $n > 64$  (except for *kai2-2* under 2.5 and 10  $\mu\text{M}$  where  $n$   
788  $> 30$ ) in at least 3 independent experiments.

789

790 Fig. S3. Effect of GR24 on root skewing in *kai2*, *max2* and *d14*. Root skewing angle of Col  
791 (A), *max2-1* (B) and *d14* (C) plants grown under control conditions or in the presence of 1 or  
792 5  $\mu\text{M}$  GR24 in the medium. Data for each genotype are displayed as a beanplot with the  
793 skewing angle of individual roots shown as dark green horizontal lines, while the mean is  
794 represented by a thick black horizontal line. The estimated density of the distribution is  
795 illustrated by the shaded colour. The dashed line corresponds to the mean for the control  
796 conditions. \* indicates a significant difference compared to control conditions (Tukey HSD,  $p$

797 < 0.05). For each treatment and genotype combination,  $n > 86$  in at least 3 independent  
798 experiments.

799

800 Fig. S4. *sks3* and *sku5* do not suppress the high lateral root density in *max2*

801 Lateral roots per cm of primary roots in 9-d-old seedlings. Data are shown as mean  $\pm$  SE. For  
802 each genotype,  $n > 51$  plants grown in 5 separate experiment. Letters indicate significant  
803 differences (Tukey HSD,  $p < 0.05$ ).

804

805 Fig. S5. *sks3* does not suppress low germination rate in *max2*

806 Seeds were germinated on 0.8% (w/v) agar plates and germination rate was scored after 72h.

807 Data are shown as mean  $\pm$  SE, for 10 batches of seeds each batch holding  $> 80$  seeds. • Indicates  
808 significant difference compare to the wild type (Tukey HSD,  $p < 0.1$ ).

809

810 Fig. S6. Root diameter of *max2-7* and *kai2-2* plants was lower than that of wild type. Letters  
811 indicate statistical significance at the 1% level (Tukey, HSD). Data shown as mean  $\pm$  SE,  $n >$   
812 36 per genotype in a total of 5 experiments.

813

814

Figure 1

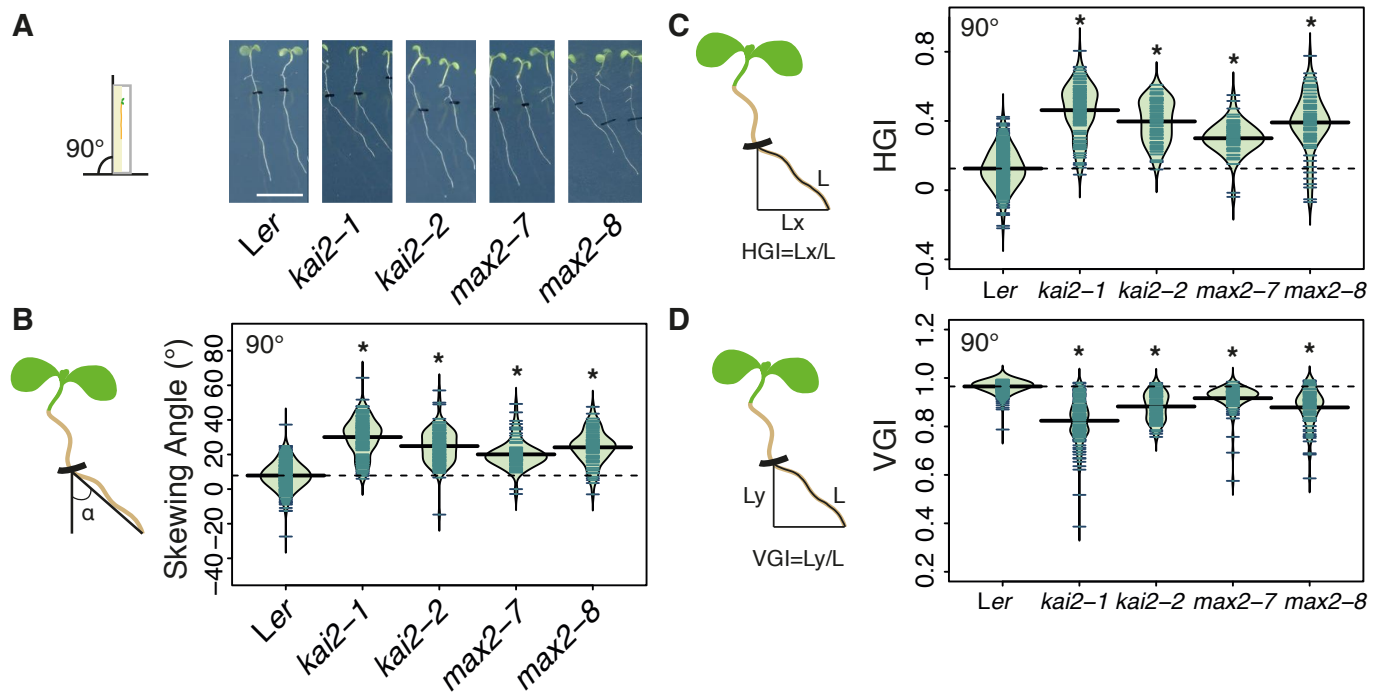



Figure 2

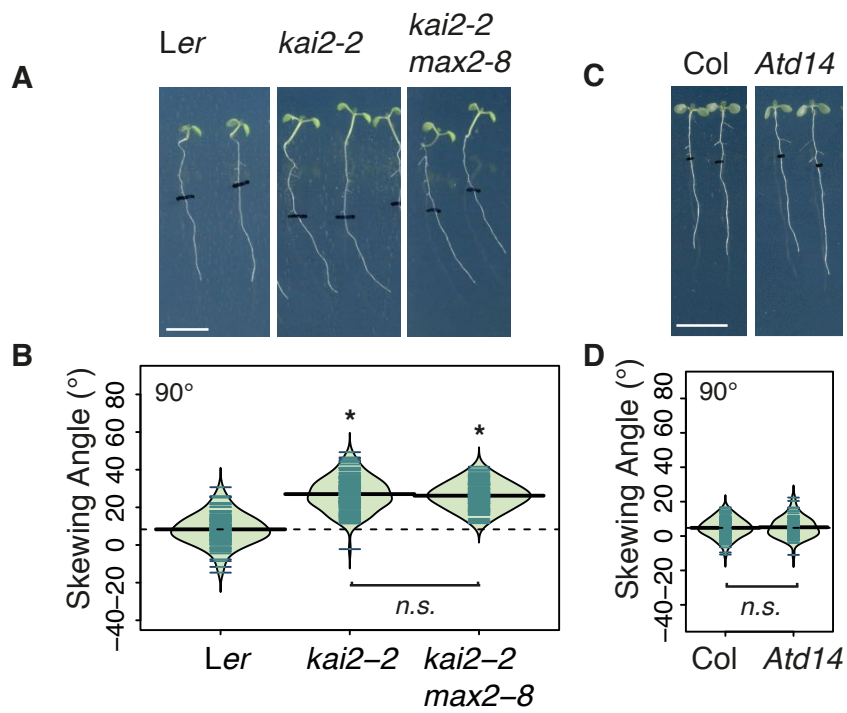

Figure 3

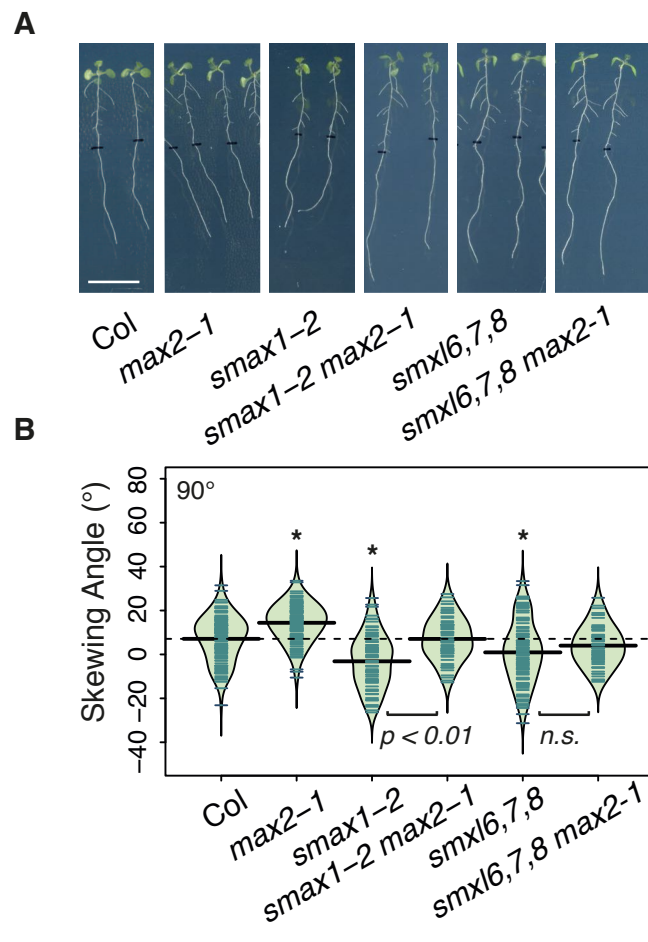

Figure 4

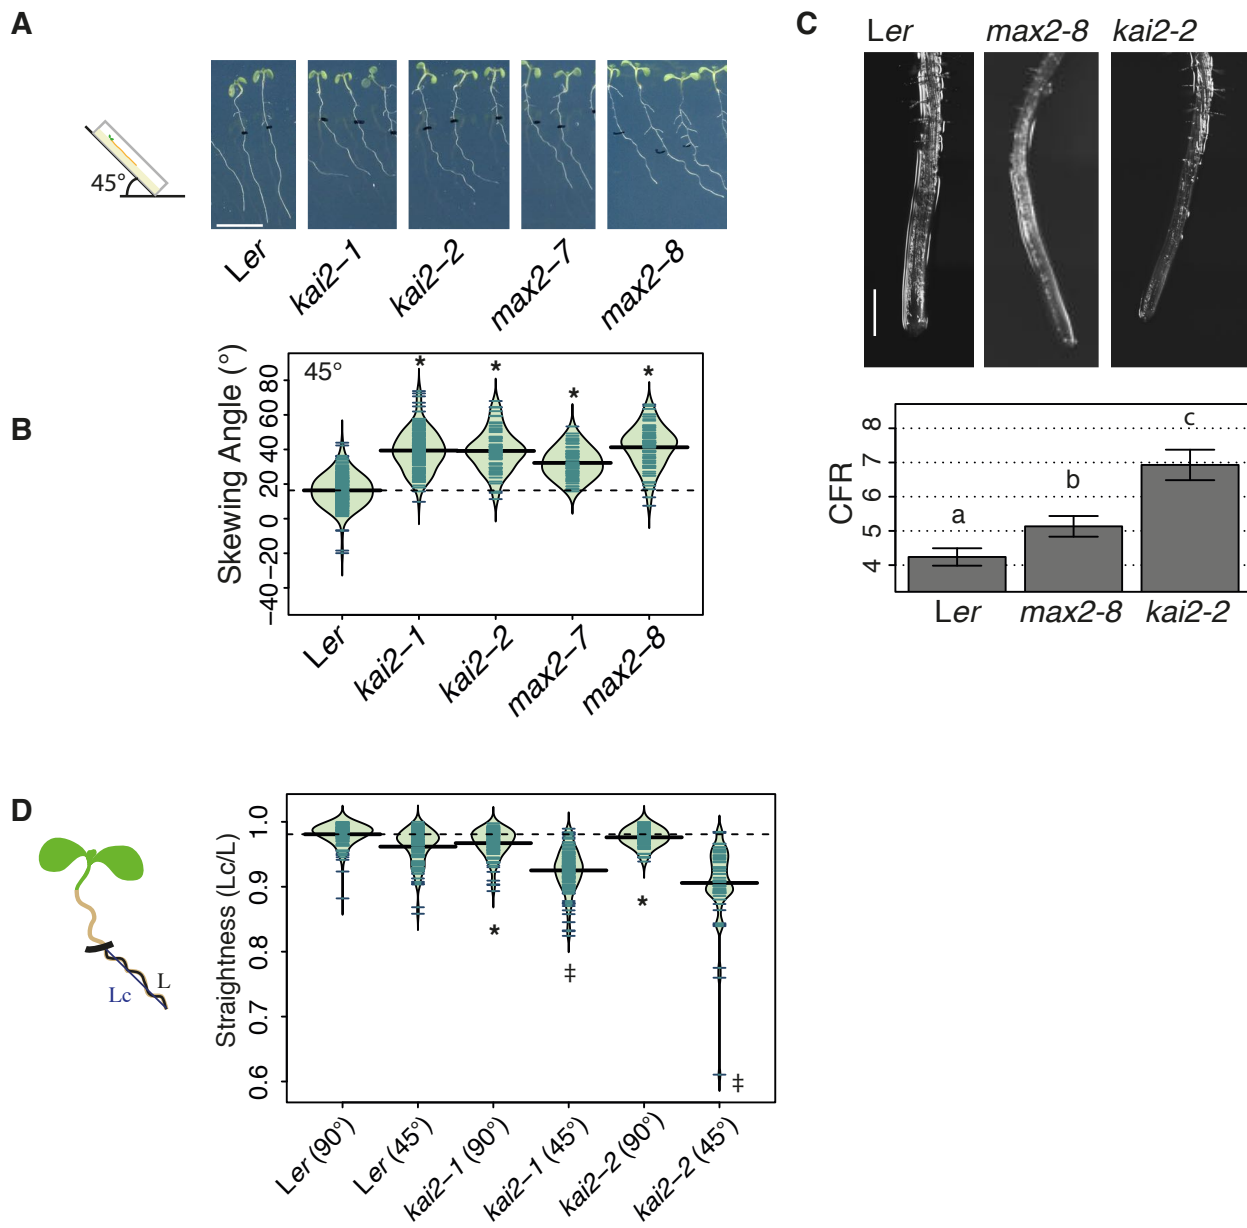

Figure 5

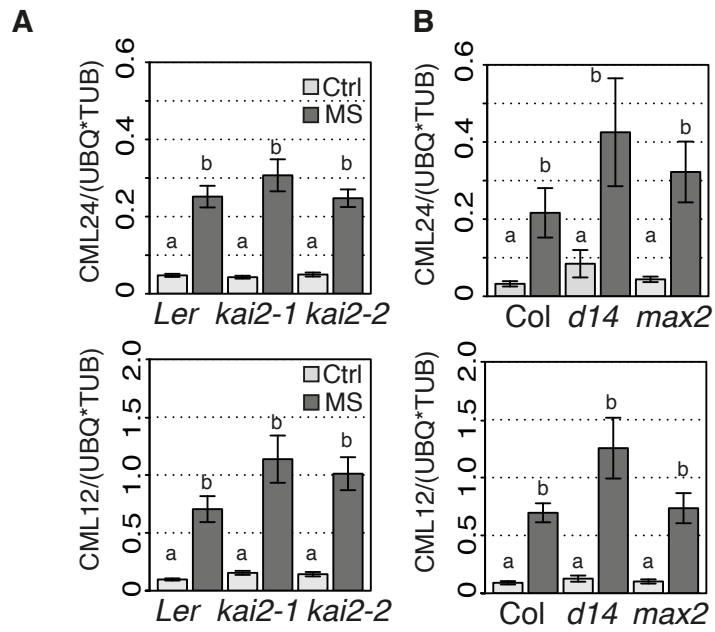

Figure 6

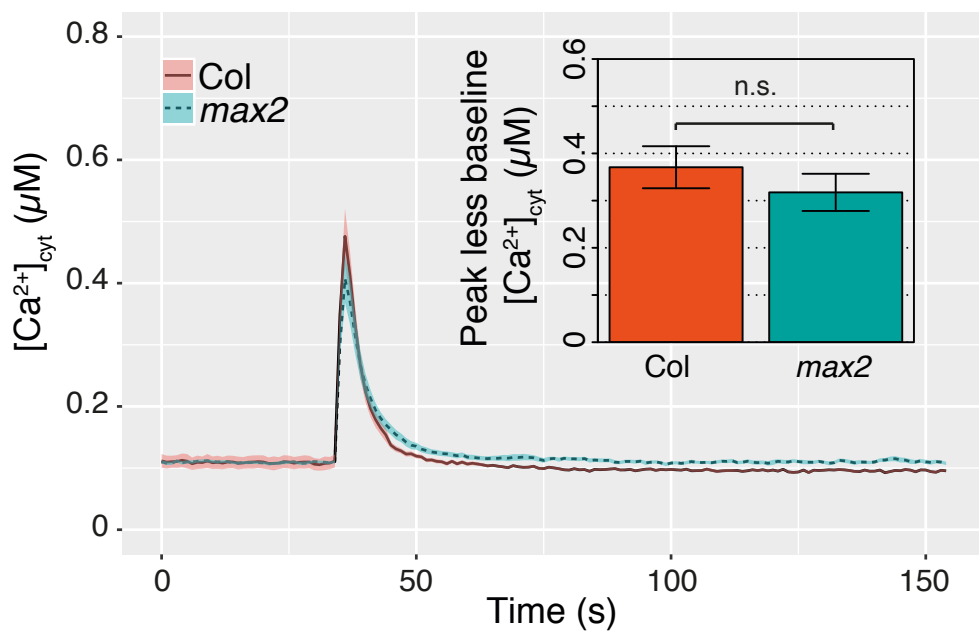

Figure 7

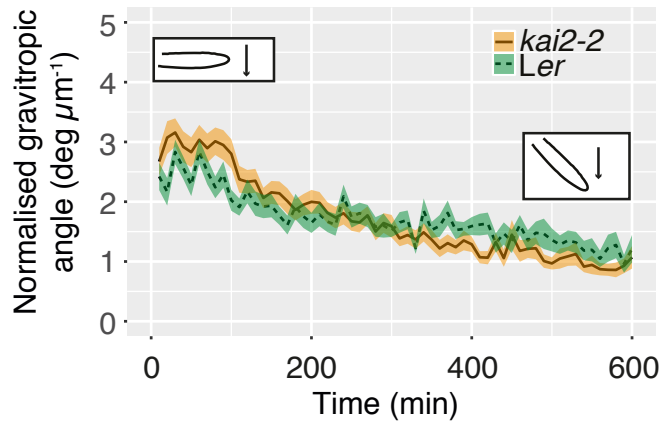



Figure 8

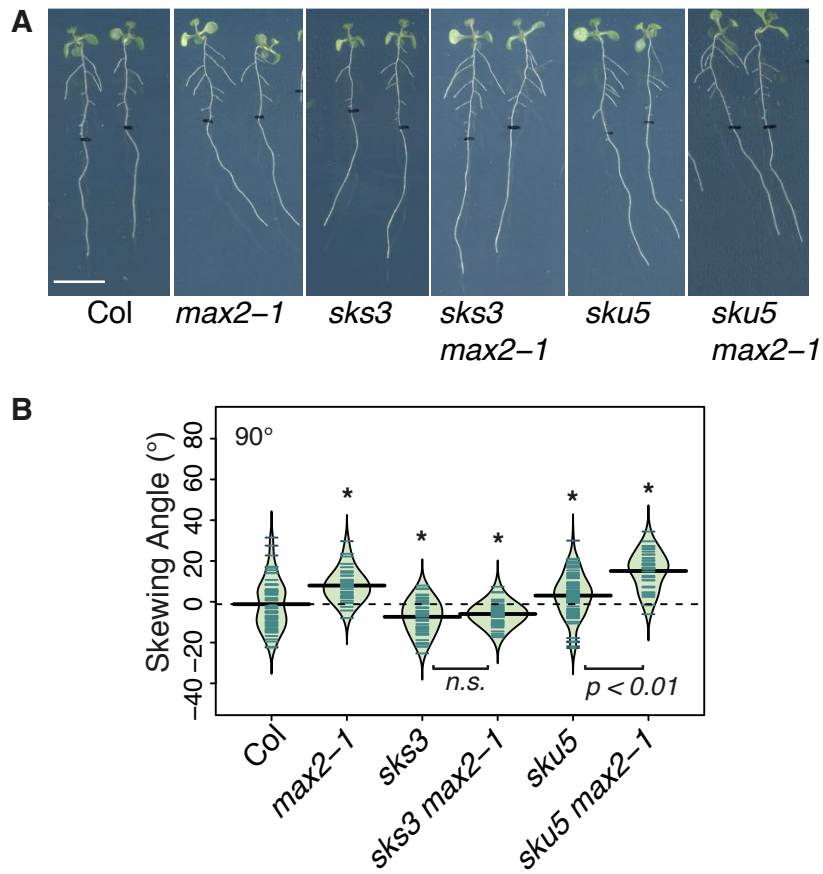

Source: https://www.biorxiv.org/content/10.1101/195891v1.full.pdf
